# Supplementary material for: Triiodothyronine regulates angiogenic growth factor and cytokine secretion by isolated human decidual cells in a cell-type specific and gestational age-dependent manner
Source: PubMed Central journal article supplement — Hum Reprod. 2014 Mar 13;29(6):1161–72. doi: 10.1093/humrep/deu046 (PMC4017942; doi:10.1093/humrep/deu046), 2014-03-13
Supplement: supp_deu046_deu046_supp_fig1.pdf [file supp_deu046_deu046_supp_fig1.pdf]

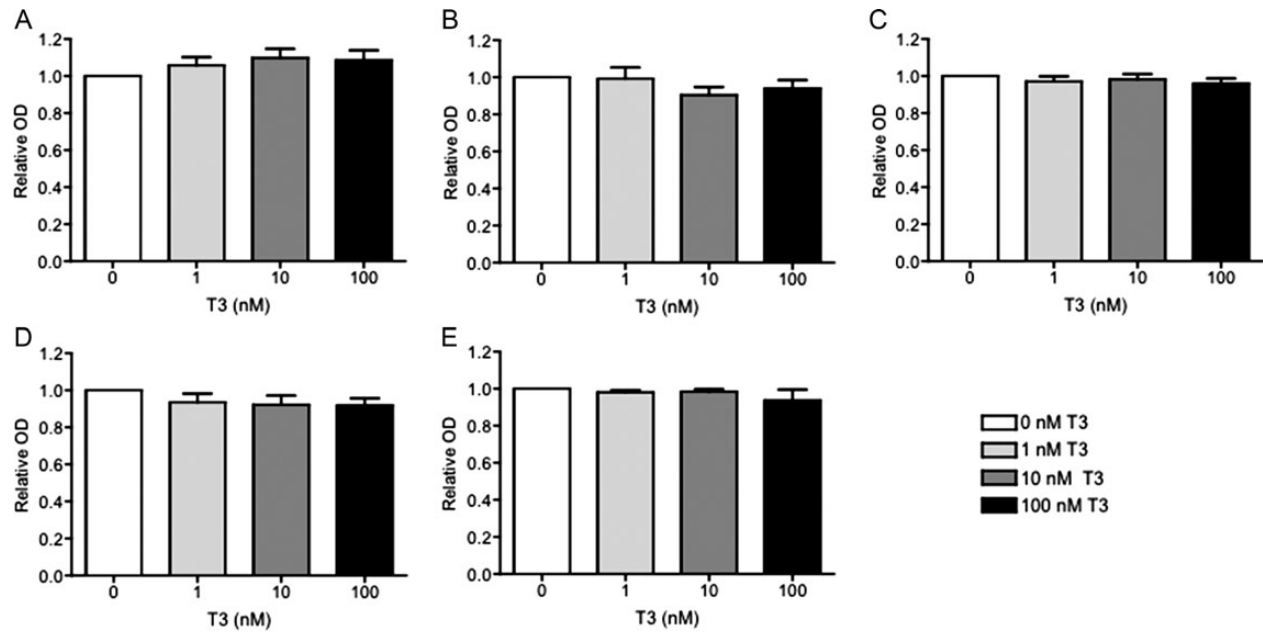

**Supplementary Figure 1** Effect of triiodothyronine (T3) on first trimester (8–11 weeks of gestation) decidual cell viability. Viability was assessed after 24 h of treatment with 0, 1, 10 or 100 nM T3 using the MTT assay. Within each experiment, each condition was assessed in four replicates and the absorbance values (OD) obtained were compared with that of the control (0 nM T3), which was given an arbitrary value of 1. **(A)** Total decidual cells ( $n = 6$ ), **(B)** stromal-enriched cells (CD10+;  $n = 4$ ), **(C)** stromal-depleted cells (CD10-;  $n = 4$ ), **(D)** uterine natural killer (uNK) cells (CD56+;  $n = 5$ ), **(E)** macrophages (CD14+;  $n = 3$ ). Bars represent mean + SEM.
