# Supplementary material for: Triiodothyronine regulates angiogenic growth factor and cytokine secretion by isolated human decidual cells in a cell-type specific and gestational age-dependent manner
Source: PubMed Central journal article supplement — Hum Reprod. 2014 Mar 13;29(6):1161–72. doi: 10.1093/humrep/deu046 (PMC4017942; doi:10.1093/humrep/deu046), 2014-03-13
Supplement: supp_deu046_deu046_supp_table1.pdf [file supp_deu046_deu046_supp_table1.pdf]

**Supplementary Table I** Effect of T3 on angiogenic growth factor secretion by human decidual cells.

|                      |               | T3 (nM)   | Angiogenin    | Angiopoietin-2 | FGF-basic | TIMP-1      | ICAM-1      | VEGF-A      | PDGF-BB     | KGF                         |             |
|----------------------|---------------|-----------|---------------|----------------|-----------|-------------|-------------|-------------|-------------|-----------------------------|-------------|
| Total decidual cells | 1st trimester | 0         | N = 6         | N = 3          | N = 5     | Above limit | N = 4       | N = 5       | Below limit | Below limit in most samples |             |
|                      |               | 1         | 1.0 ± 0.1     | 1.0 ± 0.1      | 0.9 ± 0.2 |             | 0.7 ± 0.1   | 0.6 ± 0.2*  |             |                             |             |
|                      |               | 10        | 1.1 ± 0.1     | 1.1 ± 0.1      | 0.9 ± 0.2 |             | 1.0 ± 0.4   | 0.8 ± 0.2   |             |                             |             |
|                      | 2nd trimester | 100       | 1.0 ± 0.1     | 1.0 ± 0.1      | 0.8 ± 0.2 |             | 1.0 ± 0.2   | 0.7 ± 0.2   |             |                             |             |
|                      |               | 0         | N = 5         | N = 4          | N = 5     | Above limit | N = 3       | N = 4       | Below limit | Below limit in most samples |             |
|                      |               | 1         | 1.9 ± 0.6*    | 2.0 ± 0.9      | 0.9 ± 0.2 |             | 1.3 ± 0.1   | 1.3 ± 0.1   |             |                             |             |
|                      |               | 10        | 1.4 ± 0.2     | 1.1 ± 0.0      | 0.9 ± 0.2 |             | 1.1 ± 0.1   | 1.2 ± 0.1   |             |                             |             |
|                      |               | 100       | 1.3 ± 0.3     | 0.9 ± 0.2      | 0.8 ± 0.2 |             | 1.0 ± 0.3   | 1.1 ± 0.2   |             |                             |             |
|                      |               | uNK cells | 1st trimester | 0              | N = 6     | N = 6       | N = 3       | N = 3       | N = 5       | N = 4                       | Below limit |
|                      | 1             |           |               | 1.1 ± 0.1      | 1.0 ± 0.1 | 1.1 ± 0.1   | 1.0 ± 0.1   | 1.0 ± 0.1   | 1.3 ± 0.4   |                             |             |
|                      | 10            |           |               | 1.1 ± 0.1      | 1.4 ± 0.4 | 1.1 ± 0.1   | 1.1 ± 0.1   | 1.3 ± 0.5   | 1.3 ± 0.4   |                             |             |
|                      | 2nd trimester |           | 100           | 1.0 ± 0.1      | 1.0 ± 0.1 | 0.7 ± 0.1   | 0.9 ± 0.1   | 0.9 ± 0.2   | 1.2 ± 0.2   |                             |             |
| 0                    |               |           | N = 5         | N = 5          | N = 3     | N = 4       | N = 3       | N = 5       | Below limit | Below limit in most samples |             |
| 1                    |               |           | 1.2 ± 0.2     | 1.2 ± 0.3      | 1.0 ± 0.1 | 1.3 ± 0.4   | 1.1 ± 0.1   | 1.4 ± 0.3   |             |                             |             |
| 10                   |               |           | 1.3 ± 0.2     | 1.4 ± 0.4      | 1.0 ± 0.1 | 1.2 ± 0.4   | 1.1 ± 0.2   | 1.4 ± 0.3   |             |                             |             |
| 100                  |               |           | 1.3 ± 0.4     | 1.6 ± 0.7      | 1.0 ± 0.3 | 1.6 ± 0.8   | 1.6 ± 0.6   | 1.9 ± 0.7   |             |                             |             |
| Macrophages          |               |           | 1st trimester | 0              | N = 5     | Above limit | Above limit | Above limit | Above limit | N = 5                       | Below limit |
|                      | 1             | 0.9 ± 0.2 |               |                |           |             |             | 0.9 ± 0.1   |             |                             |             |
|                      | 10            | 0.9 ± 0.2 |               |                |           |             |             | 0.9 ± 0.1   |             |                             |             |
|                      | 2nd trimester | 100       | 1.1 ± 0.3     |                |           |             |             | 1.2 ± 0.2   |             |                             |             |
|                      |               | 0         | N = 4         | Above limit    | N = 3     | Above limit | Above limit | N = 4       | Below limit | Below limit in most samples |             |
|                      |               | 1         | 1.1 ± 0.2     |                | 0.9 ± 0.2 |             |             | 1.0 ± 0.2   |             |                             |             |
|                      |               | 10        | 1.3 ± 0.3     |                | 1.1 ± 0.3 |             |             | 1.1 ± 0.2   |             |                             |             |
|                      |               | 100       | 1.1 ± 0.4     |                | 0.7 ± 0.1 |             |             | 0.9 ± 0.2   |             |                             |             |

Data are normalized to 0 nM within each experiment and presented as mean ± SEM. Samples with concentrations above the manufacturer's standard curve limit or below the detection threshold were excluded. PDGF-BB was below the detection limit in all samples and KGF was only detectable in two or less samples per experimental set.

Ang-2, angiopoietin-2; FGF-basic, fibroblast growth factor basic; TIMP-1, tissue inhibitor of metalloproteinase 1; ICAM-1, intracellular adhesion molecule 1; VEGF-A, vascular endothelial growth factor-A; PDGF-BB, platelet-derived growth factor-BB; KGF, keratinocyte growth factor; uNK cells, uterine natural killer cells.

\*P < 0.05 compared with no T3 treatment (0 nM).
