# Supplementary material for: Triiodothyronine regulates angiogenic growth factor and cytokine secretion by isolated human decidual cells in a cell-type specific and gestational age-dependent manner
Source: PubMed Central journal article supplement — Hum Reprod. 2014 Mar 13;29(6):1161–72. doi: 10.1093/humrep/deu046 (PMC4017942; doi:10.1093/humrep/deu046), 2014-03-13
Supplement: supp_deu046_deu046_supp_table2.pdf [file supp_deu046_deu046_supp_table2.pdf]

**Supplementary Table II** Effect of T3 on cytokine secretion by human decidual cells.

|                      |               | T3 (nM) | IL-8           | GM-CSF          | IL-10           | IL-1 $\beta$    | MCP-1            | RANTES           | IL-6           | IFN- $\gamma$ | TNF- $\alpha$ | IL12p70       | IL-4        | IL-2                        |
|----------------------|---------------|---------|----------------|-----------------|-----------------|-----------------|------------------|------------------|----------------|---------------|---------------|---------------|-------------|-----------------------------|
| Total decidual cells | 1st trimester | 0       | N = 6<br>      | N = 6<br>       | N = 6<br>       | N = 6<br>       | N = 6<br>        | Above limit      | Above limit    | N = 6<br>     | N = 6<br>     | Below limit   | Below limit | Below limit in most samples |
|                      |               | 1       | 0.8 $\pm$ 0.0  | 0.9 $\pm$ 0.0   | 0.7 $\pm$ 0.1*  | 0.8 $\pm$ 0.0   | 0.8 $\pm$ 0.1    |                  |                | 1.0 $\pm$ 0.0 | 0.9 $\pm$ 0.1 |               |             |                             |
|                      |               | 10      | 0.9 $\pm$ 0.1  | 1.0 $\pm$ 0.1   | 0.8 $\pm$ 0.1   | 1.0 $\pm$ 0.1   | 0.9 $\pm$ 0.1    |                  |                | 1.0 $\pm$ 0.1 | 0.9 $\pm$ 0.1 |               |             |                             |
|                      | 2nd trimester | 100     | 0.9 $\pm$ 0.1  | 1.1 $\pm$ 0.1   | 0.7 $\pm$ 0.1*  | 1.1 $\pm$ 0.1   | 1.0 $\pm$ 0.2    |                  |                | 0.9 $\pm$ 0.1 | 1.0 $\pm$ 0.1 |               |             |                             |
|                      |               | 0       | N = 6<br>      | N = 6<br>       | N = 6<br>       | N = 6<br>       | N = 6<br>        | Above limit      | Above limit    | N = 4<br>     | N = 4<br>     | Below limit   | Below limit | Below limit in most samples |
|                      |               | 1       | 0.9 $\pm$ 0.1  | 0.8 $\pm$ 0.1   | 1.7 $\pm$ 0.6*  | 0.9 $\pm$ 0.1   | 0.8 $\pm$ 0.1    |                  |                | 1.1 $\pm$ 0.2 | 1.1 $\pm$ 0.1 |               |             |                             |
|                      |               | 10      | 0.8 $\pm$ 0.1  | 0.8 $\pm$ 0.0   | 1.5 $\pm$ 0.6   | 0.9 $\pm$ 0.1   | 0.7 $\pm$ 0.1    |                  |                | 1.0 $\pm$ 0.1 | 1.1 $\pm$ 0.1 |               |             |                             |
|                      |               | 100     | 0.8 $\pm$ 0.1  | 0.9 $\pm$ 0.0   | 1.2 $\pm$ 0.4   | 1.0 $\pm$ 0.1   | 0.8 $\pm$ 0.1    |                  |                | 1.3 $\pm$ 0.1 | 1.1 $\pm$ 0.1 |               |             |                             |
|                      |               |         |                |                 |                 |                 |                  |                  |                |               |               |               |             |                             |
| uNK cells            | 1st trimester | 0       | N = 6<br>      | N = 6<br>       | N = 3<br>       | N = 6<br>       | N = 6<br>        | N = 3<br>        | N = 3<br>      | N = 5<br>     | N = 5<br>     | Below limit   | Below limit | Below limit in most samples |
|                      |               | 1       | 1.1 $\pm$ 0.2  | 0.9 $\pm$ 0.1   | 0.9 $\pm$ 0.2   | 0.8 $\pm$ 0.1   | 1.0 $\pm$ 0.1    | 0.9 $\pm$ 0.1    | 0.7 $\pm$ 0.2  | 0.9 $\pm$ 0.1 | 1.0 $\pm$ 0.1 |               |             |                             |
|                      |               | 10      | 1.1 $\pm$ 0.2  | 1.0 $\pm$ 0.2   | 1.2 $\pm$ 0.4   | 0.8 $\pm$ 0.1   | 1.0 $\pm$ 0.1    | 0.8 $\pm$ 0.1    | 1.3 $\pm$ 0.8  | 1.2 $\pm$ 0.1 | 0.7 $\pm$ 0.1 |               |             |                             |
|                      | 2nd trimester | 100     | 1.2 $\pm$ 0.2  | 1.2 $\pm$ 0.3   | 1.5 $\pm$ 0.7   | 1.2 $\pm$ 0.2   | 1.1 $\pm$ 0.1    | 1.0 $\pm$ 0.2    | 1.9 $\pm$ 1.0* | 1.1 $\pm$ 0.1 | 0.9 $\pm$ 0.2 |               |             |                             |
|                      |               | 0       | N = 6<br>      | N = 6<br>       | N = 4<br>       | N = 6<br>       | N = 6<br>        | N = 3<br>        | N = 4<br>      | N = 5<br>     | N = 5<br>     | Below limit   | Below limit | Below limit in most samples |
|                      |               | 1       | 1.0 $\pm$ 0.1  | 1.0 $\pm$ 0.1   | 0.9 $\pm$ 0.1   | 0.8 $\pm$ 0.1   | 1.1 $\pm$ 0.1    | 0.8 $\pm$ 0.1    | 0.8 $\pm$ 0.2  | 1.0 $\pm$ 0.0 | 0.9 $\pm$ 0.0 |               |             |                             |
|                      |               | 10      | 1.0 $\pm$ 0.0  | 1.0 $\pm$ 0.1   | 0.9 $\pm$ 0.1   | 0.8 $\pm$ 0.1   | 1.1 $\pm$ 0.1    | 0.9 $\pm$ 0.0    | 0.8 $\pm$ 0.2  | 1.1 $\pm$ 0.1 | 0.8 $\pm$ 0.1 |               |             |                             |
|                      |               | 100     | 1.0 $\pm$ 0.0  | 1.2 $\pm$ 0.1   | 0.8 $\pm$ 0.2   | 1.2 $\pm$ 0.2   | 1.0 $\pm$ 0.0    | 1.1 $\pm$ 0.0    | 1.0 $\pm$ 0.2  | 1.2 $\pm$ 0.1 | 1.2 $\pm$ 0.2 |               |             |                             |
|                      |               |         |                |                 |                 |                 |                  |                  |                |               |               |               |             |                             |
| Macrophages          | 1st trimester | 0       | N = 5<br>      | N = 5<br>       | N = 3<br>       | N = 4<br>       | N = 5<br>        | Above limit      | Above limit    | N = 4<br>     | N = 4<br>     | Below limit   | Below limit | Below limit in most samples |
|                      |               | 1       | 0.7 $\pm$ 0.1* | 0.7 $\pm$ 0.1   | 0.8 $\pm$ 0.1   | 0.7 $\pm$ 0.1*  | 0.5 $\pm$ 0.2*** | 0.5 $\pm$ 0.1*** |                |               | 0.9 $\pm$ 0.1 | 0.9 $\pm$ 0.0 |             |                             |
|                      |               | 10      | 0.7 $\pm$ 0.1* | 0.7 $\pm$ 0.0** | 0.7 $\pm$ 0.2   | 0.6 $\pm$ 0.0** | 0.5 $\pm$ 0.1*** | 0.5 $\pm$ 0.1*** |                |               | 1.0 $\pm$ 0.1 | 1.0 $\pm$ 0.1 |             |                             |
|                      | 2nd trimester | 100     | 0.7 $\pm$ 0.1  | 0.7 $\pm$ 0.1** | 0.5 $\pm$ 0.2** | 0.7 $\pm$ 0.1*  | 0.5 $\pm$ 0.1*** |                  |                | 1.0 $\pm$ 0.1 | 0.9 $\pm$ 0.1 |               |             |                             |
|                      |               | 0       | N = 5<br>      | N = 5<br>       | N = 5<br>       | N = 5<br>       | N = 5<br>        | Above limit      | Above limit    | Not assessed  | Not assessed  | Below limit   | Below limit | Below limit in most samples |
|                      |               | 1       | 0.9 $\pm$ 0.1  | 1.0 $\pm$ 0.1   | 1.0 $\pm$ 0.1   | 0.9 $\pm$ 0.1   | 0.9 $\pm$ 0.1    |                  |                |               |               |               |             |                             |
|                      |               | 10      | 1.0 $\pm$ 0.1  | 1.1 $\pm$ 0.1   | 1.1 $\pm$ 0.1   | 1.0 $\pm$ 0.1   | 1.0 $\pm$ 0.0    |                  |                |               |               |               |             |                             |
|                      |               | 100     | 0.8 $\pm$ 0.1  | 1.0 $\pm$ 0.1   | 1.0 $\pm$ 0.1   | 0.9 $\pm$ 0.1   | 1.0 $\pm$ 0.1    |                  |                |               |               |               |             |                             |
|                      |               |         |                |                 |                 |                 |                  |                  |                |               |               |               |             |                             |

Data are normalized to 0 nM within each experiment and presented as mean  $\pm$  SEM. Samples with concentrations above the manufacturer's standard curve limit or below the detection threshold were excluded. IL12p70 and IL-4 were below the detection limit in all samples. IL-2 was only detectable in two or less samples per experimental set.

IL, interleukin; GM-CSF, granulocyte macrophage colony stimulating factor; MCP-1, monocyte chemoattractant protein-1; RANTES, regulated on activation normal T cell expressed and secreted; IFN, interferon; TNF, tumour necrosis factor; uNK cells, uterine natural killer cells.

\* $P < 0.05$ , \*\* $P < 0.01$ , \*\*\* $P < 0.001$ .

\* $P < 0.001$  compared with no T3 treatment (0 nM)
